# Supplementary material for: One-step chemical vapor deposition synthesis and supercapacitor performance of nitrogen-doped porous carbon–carbon nanotube hybrids
Source: publisher site journal article supplement (doi:10.3762/bjnano.8.267), 2017-12-12
Supplement: Additional file 1 [file 2190-4286-8-267-S1.pdf]

# Supporting Information

for

## **One-step chemical vapor deposition synthesis and supercapacitor performance of nitrogen-doped porous carbon–carbon nanotube hybrids**

Egor V. Lobiak\*<sup>1</sup>, Lyubov G. Bulusheva<sup>1,2</sup>, Ekaterina O. Fedorovskaya<sup>1,2</sup>, Yury V. Shubin<sup>1,2</sup>,  
Pavel E. Plyusnin<sup>1,2</sup>, Pierre Lonchambon<sup>3</sup>, Boris V. Senkovskiy<sup>4,5</sup>, Zinfer R. Ismagilov<sup>6,7</sup>,  
Emmanuel Flahaut<sup>3</sup>, and Alexander V. Okotrub<sup>1,2</sup>

Address: <sup>1</sup>Nikolaev Institute of Inorganic Chemistry, SB RAS, 630090 Novosibirsk, Russia,  
<sup>2</sup>Novosibirsk State University, 630090 Novosibirsk, Russia, <sup>3</sup>CNRS, Institut Carnot Cirimat, F-  
31062 Toulouse, France, <sup>4</sup>St. Petersburg State University, 7-9, Universitetskaya Nab., St.  
Petersburg 199034, Russia, <sup>5</sup>II Physikalisches Institut, Universität zu Köln, Zùlpicher StraÙe 77,  
50937 Köln, Germany, <sup>6</sup>Boreskov Institute of Catalysis, SB RAS, 630090 Novosibirsk, Russia,  
and <sup>7</sup>Institute of Coal Chemistry and Materials Science FRC CCC SB RAS, Kemerovo 650000,  
Russia

Email: Egor V. Lobiak - lobiakev@niic.sbras.ru

\* Corresponding author

## Additional Experimental Information

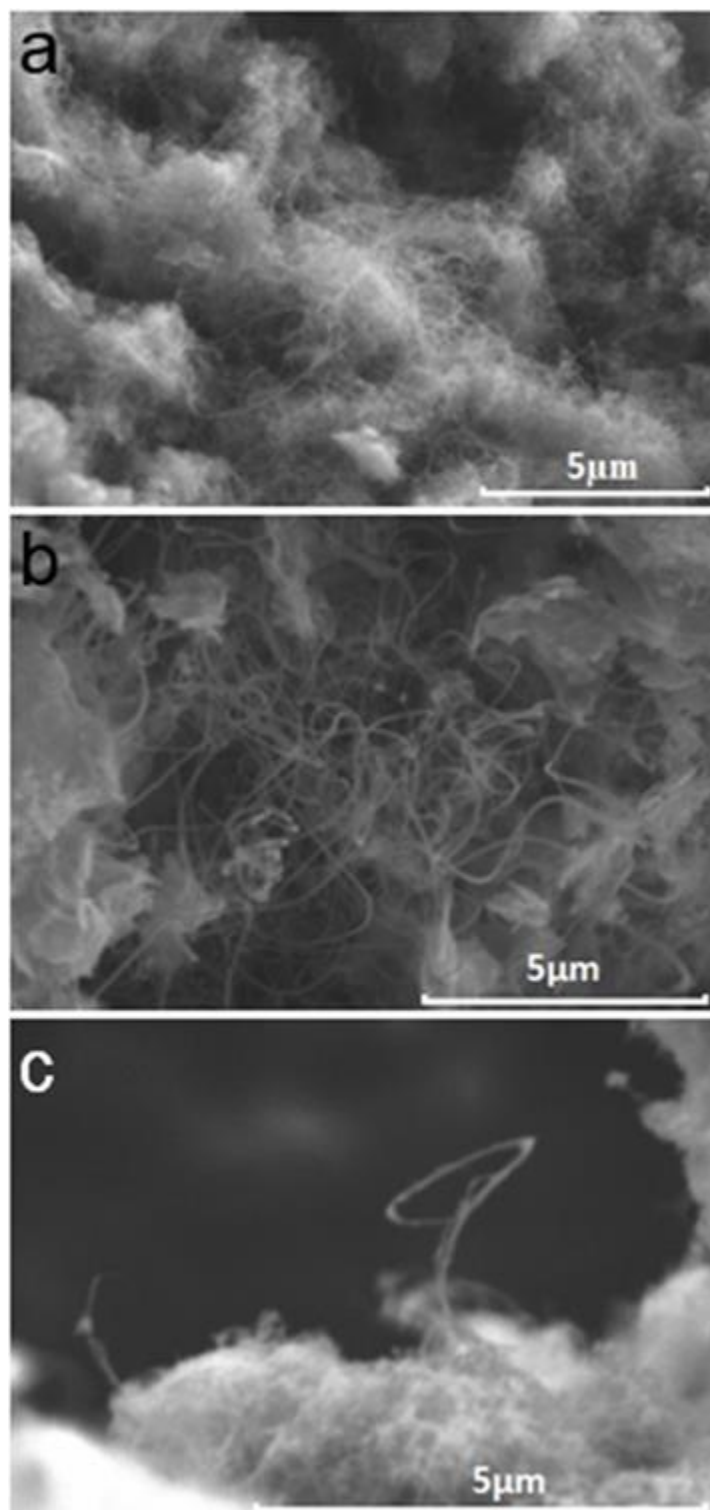

**Figure S1:** SEM images of  $CN_x$  samples synthesized using (a) Co/Mo, (b) Ni/Mo and (c) Fe/Mo catalysts. The samples were purified from the MgO support and the images demonstrate the co-existence of CNTs and non-tubular carbon.

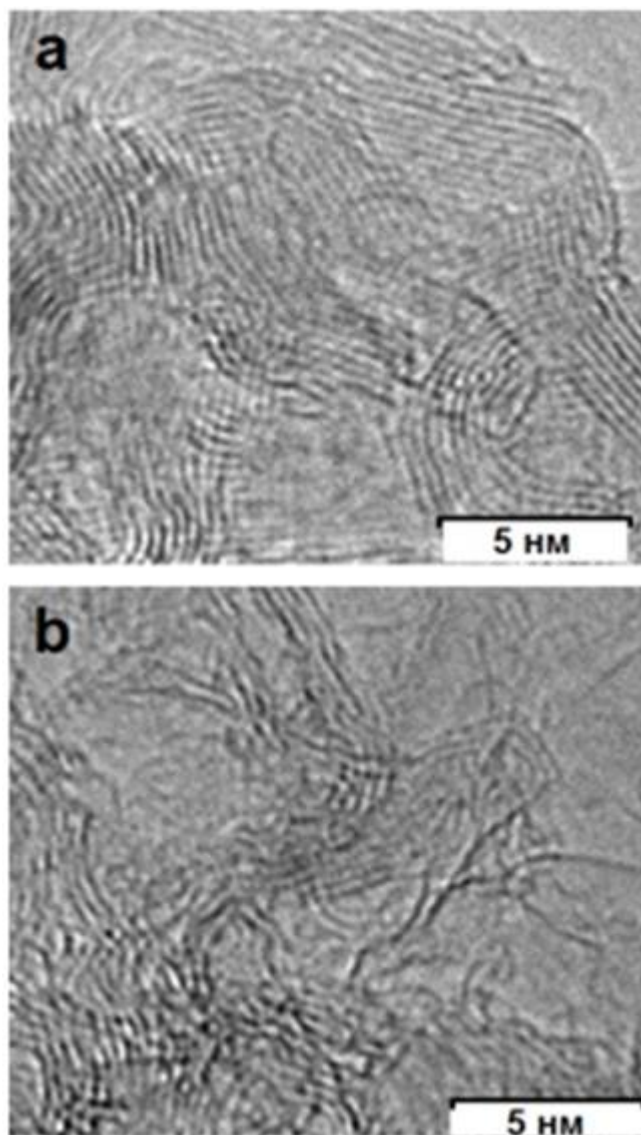

**Figure S2:** High resolution TEM images of porous carbon interlinking with CNTs synthesized using (a) Ni/Mo, (b) Fe/Mo catalysts.

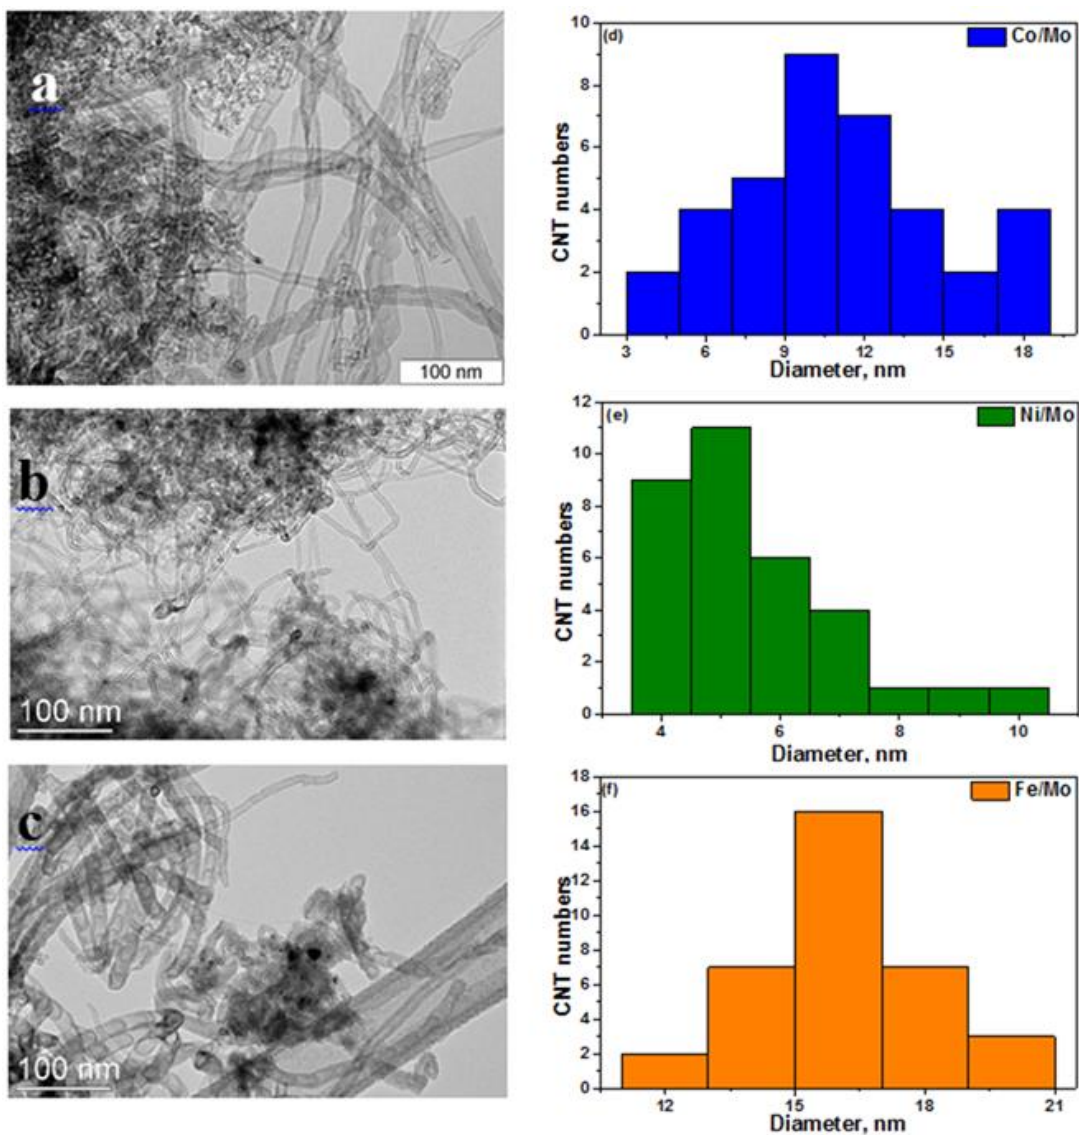

**Figure S3:** TEM images of  $CN_x$  samples synthesized using (a) Co/Mo, (b) Ni/Mo and (c) Fe/Mo catalysts, which have been used for evaluation of the outer diameter distribution of CNTs. Histograms of diameter distribution of CNTs are presented in (d) Co/Mo, (e) Ni/Mo and (f) Fe/Mo.

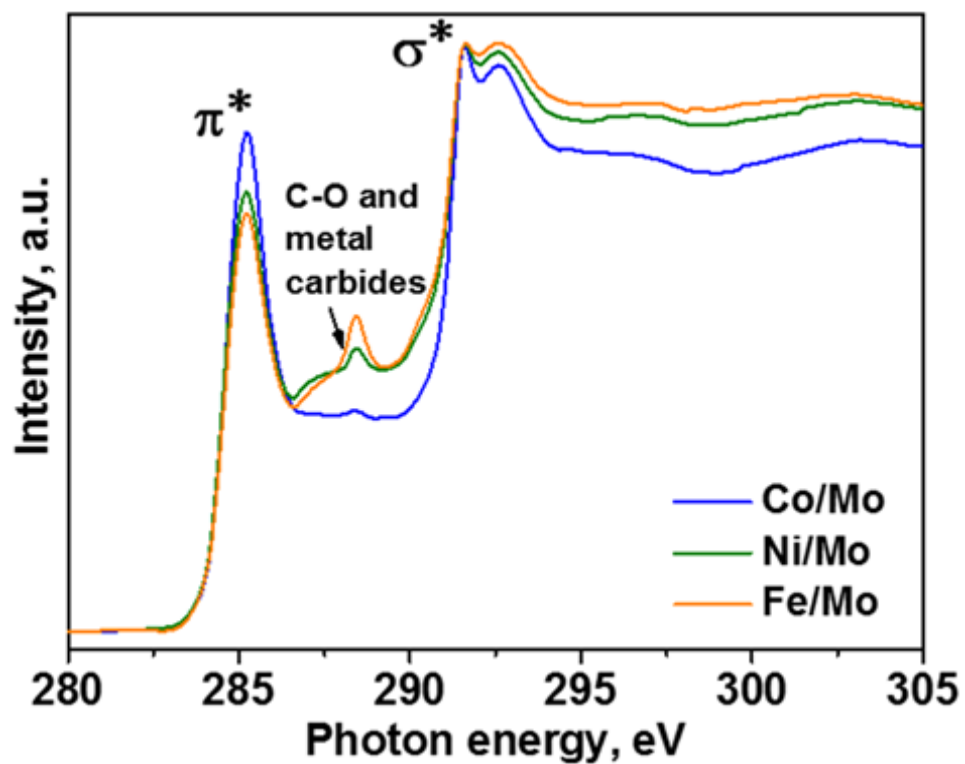

**Figure S4.** NEXAFS CK-edge spectra of  $\text{CN}_x$  samples synthesized using Co/Mo, Ni/Mo and Fe/Mo catalysts.

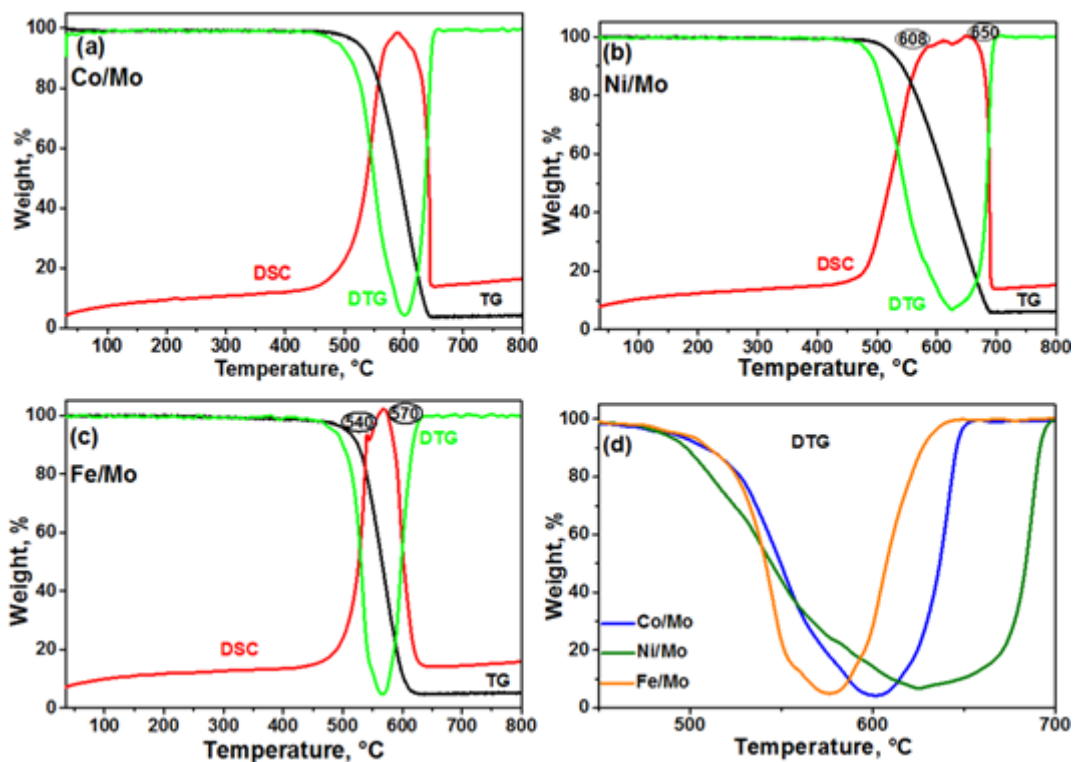

**Figure S5:** TG, DTG and DSC curves of thermal oxidation of  $CN_x$  materials synthesized using (a) Co/Mo, (b) Ni/Mo, (c) Fe/Mo catalysts. (d) Comparison of DTG curves of  $CN_x$  materials.

**Table S1.** Ratios of integral intensities of components in the DTG curves of CN<sub>x</sub> materials synthesized using different catalysts and the peak temperature of each component.

| Catalyst | Component 1  | Component 2   | Component 3   |
|----------|--------------|---------------|---------------|
| Co/Mo    | 0.5 (566 °C) | 0.3 (602 °C)  | 0.2 (627 °C)  |
| Ni/Mo    | 0.6 (580 °C) | 0.2 (640 °C)  | 0.2 (670 °C)  |
| Fe/Mo    | 0.3 (539 °C) | 0.45 (566 °C) | 0.25 (591 °C) |

**Table S2.** Total nitrogen concentration (at.%) and percentages of various nitrogen forms in CN<sub>x</sub> materials synthesized using different catalysts. The values were obtained from the XPS data.

| Catalyst | N total, at.% | N pyridinic | N pyrrolic | N graphitic | N oxidized | N <sub>2</sub> |
|----------|---------------|-------------|------------|-------------|------------|----------------|
| Ni/Mo    | 0.9           | 24.4%       | 22.4%      | 35.6%       | 9.2%       | 8.3%           |
| Co/Mo    | 1.5           | 19.2%       | 25.4%      | 39.5%       | 6.5%       | 9.4%           |
| Fe/Mo    | 2.3           | 21.4%       | 13.5%      | 45.0%       | 6.7%       | 13.4%          |

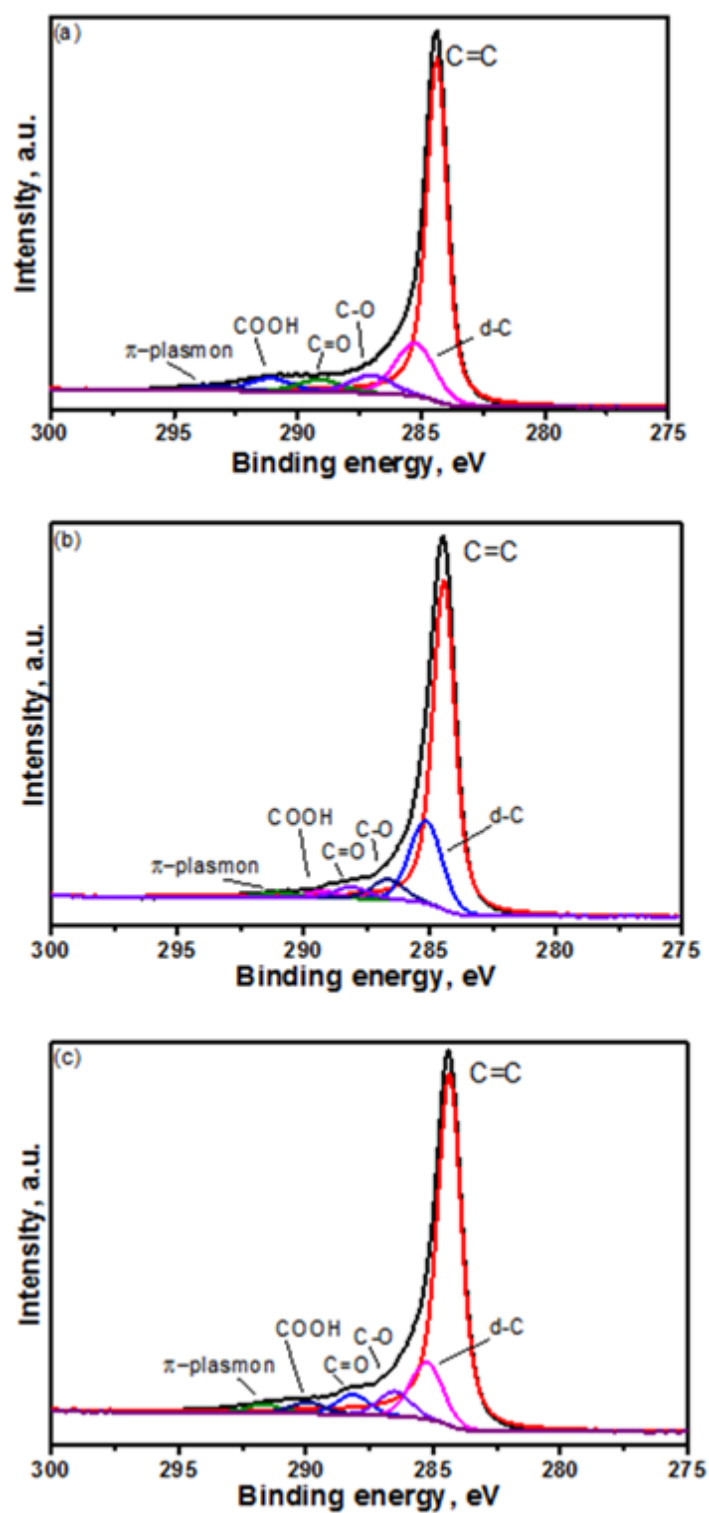

**Figure S6:** XPS C1s spectra of CN<sub>x</sub> materials synthesized using (a) Co/Mo, (b) Ni/Mo and (c) Fe/Mo catalysts.
